# Supplementary material
Source: PubMed Central journal article supplement (PMC4185278)
Supplement: NIHMS630955-supplement-Appendix_A.pdf [file NIHMS630955-supplement-Appendix_A.pdf]

## Polygenic Risk and White Matter Integrity in Individuals at High Risk of Mood Disorder

### Supplemental Information

**Table S1.** Negative association between fractional anisotropy and major depressive disorder polygene score, thresholded at  $p$  corrected (threshold-free cluster enhancement)  $<0.05$ , for polygene thresholds 0.1, 0.05 and 0.01.

| <b>Voxels</b>                  | <b>MAX (x, y, z)</b> | <b>Region</b>                                   |
|--------------------------------|----------------------|-------------------------------------------------|
| <b>0.1 polygene threshold</b>  |                      |                                                 |
| 9479                           | (38, -36, 1)         | R ILF, IFOF                                     |
| 257                            | (36, -16, 26)        | R SLF                                           |
| 53                             | (41, -37, 32)        | R SLF                                           |
| 11                             | (41, -38, 28)        | R SLF                                           |
| <b>0.05 polygene threshold</b> |                      |                                                 |
| 35030                          | (-14, 8, 3)          | Corpus callosum, extending to ILF, IFOF and SLF |
| <b>0.01 polygene threshold</b> |                      |                                                 |
| 68                             | (40, -29, -17)       | R ILF                                           |
| 63                             | (30, 31, 11)         | R IFOF                                          |
| 21                             | (23, 34, 8)          | R IFOF                                          |

IFOF, inferior fronto-occipital fasciculus; ILF, inferior longitudinal fasciculus; R, right; SLF, superior longitudinal fasciculus.

**Table S2.** Negative association between fractional anisotropy and major depressive disorder polygene score, thresholded at  $p$  corrected (threshold-free cluster enhancement)  $<0.01$  (polygene threshold 0.5).

| <b>Voxels</b> | <b>MAX (x, y, z)</b> | <b>Region</b>                        |
|---------------|----------------------|--------------------------------------|
| 5141          | (-17, -31, 31)       | L splenium of corpus callosum        |
| 2789          | (30, -48, 27)        | R SLF, ILF, IFOF                     |
| 1975          | (39, -37, -3)        | R IFOF, ILF                          |
| 962           | (-42, -28, -15)      | L sagittal stratum, ILF              |
| 147           | (20, 37, 20)         | R anterior thalamic radiation        |
| 102           | (-44, -12, -23)      | L SLF, ILF                           |
| 60            | (18, -16, 36)        | R body of corpus callosum            |
| 23            | (46, -39, 19)        | R SLF                                |
| 14            | (15, -52, 22)        | R cingulum                           |
| 14            | (-22, -18, -2)       | L posterior limb of internal capsule |
| 14            | (-18, -21, -7)       | L cerebral peduncle                  |
| 11            | (16, -29, 30)        | R body of corpus callosum            |

IFOF, inferior fronto-occipital fasciculus; ILF, inferior longitudinal fasciculus; L, left; R, right; SLF, superior longitudinal fasciculus.
